# Supplementary material for: IFN-β is a macrophage-derived effector cytokine facilitating the resolution of bacterial inflammation
Source: PubMed Central journal article supplement (PMC6677895; doi:10.1038/s41467-019-10903-9), 2019-08-02
Supplement: 41467_2019_10903_MOESM1_ESM.pdf [file 41467_2019_10903_MOESM1_ESM.pdf]

## **Supplementary Materials**

### **IFN- $\beta$ is a macrophage-derived effector cytokine facilitating the resolution of bacterial inflammation**

Senthil K. Satyanarayanan<sup>1,#</sup>, Driss El Kebir<sup>2,#</sup>, Soaad Soboh<sup>1,#</sup>, Sergei Butenko<sup>1,~</sup>, Meriem Sekheri<sup>2,~</sup>, Janan Saadi<sup>1</sup>, Neta Peled<sup>1</sup>, Simaan Assi<sup>1</sup>, Amira Othman<sup>2</sup>, Sagie Schif-Zuck<sup>1</sup>, Yonatan Feuermann<sup>3</sup>, Dalit Barkan<sup>1</sup>, Noa Sher<sup>4</sup>, János G. Filep<sup>2\*</sup>, and Amiram Ariel<sup>1\*</sup>

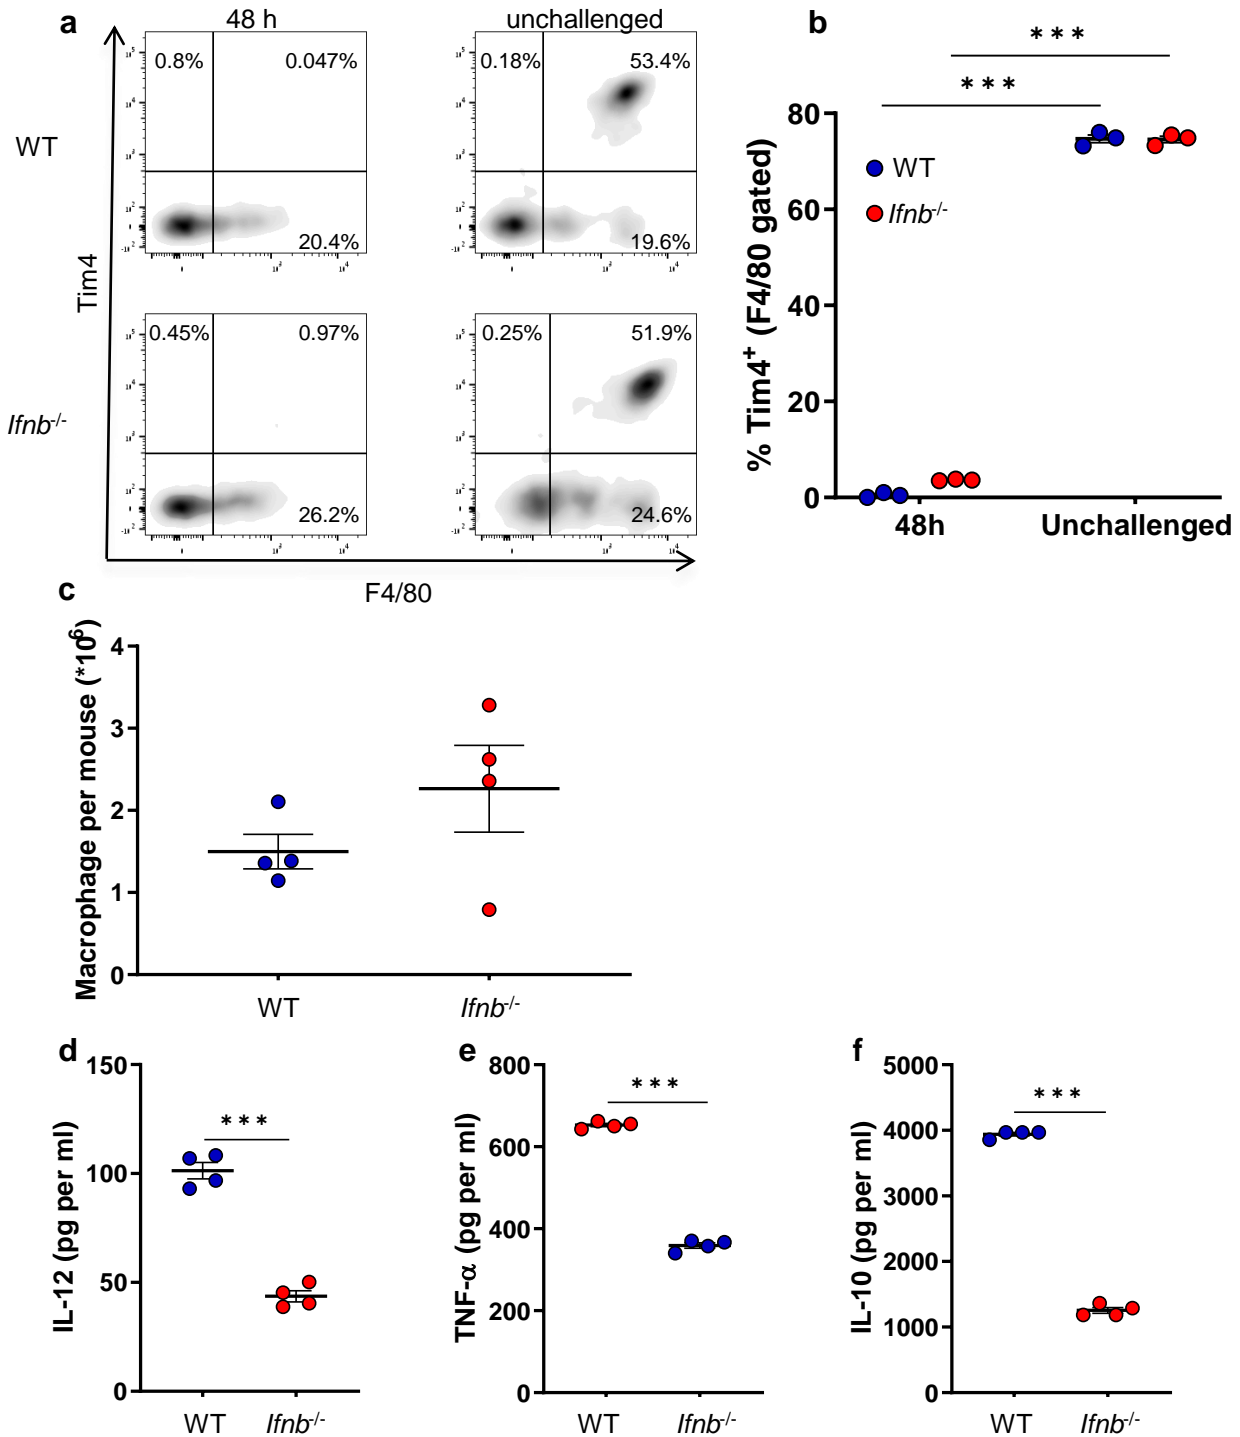

**Supplementary Figure 1. Resolution phase macrophages from zymosan A peritonitis are essentially devoid of resident Tim4<sup>+</sup> macrophages, and IFN-β deficiency does not affect resident macrophage numbers and origin, but reduces cytokine production.** Peritoneal cells were recovered from WT or *Ifnb*<sup>-/-</sup> mice 48 h PPI or prior to challenge, enumerated and immunostained for F4/80 and Tim4, and the percentage of F4/80<sup>+</sup>Tim4<sup>+</sup> macrophages was analyzed by flow cytometry. (a) Representative density plots. (b) Values are means ± SEM from 3-5 mice. (c) Total resident macrophages numbers. (d-f) Macrophage secretion of IL-12 (d), TNF-α (e), and IL-10 (f) after 48 h culture *ex vivo* without challenge. Results are means ± SEM from 4 mice. \* P < 0.05, \*\*\* P < 0.005 (Student's t-test). Source data are provided as a Source Data file.

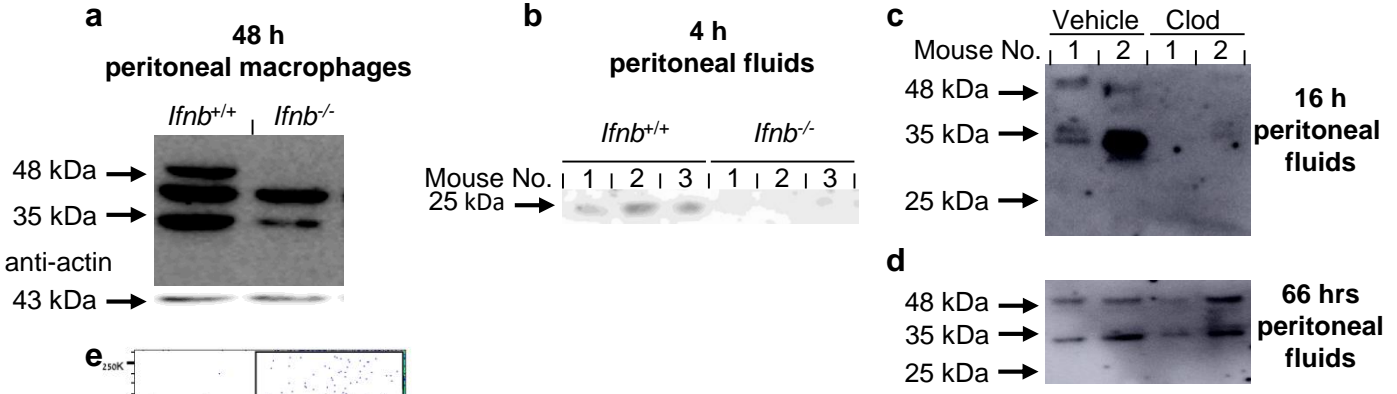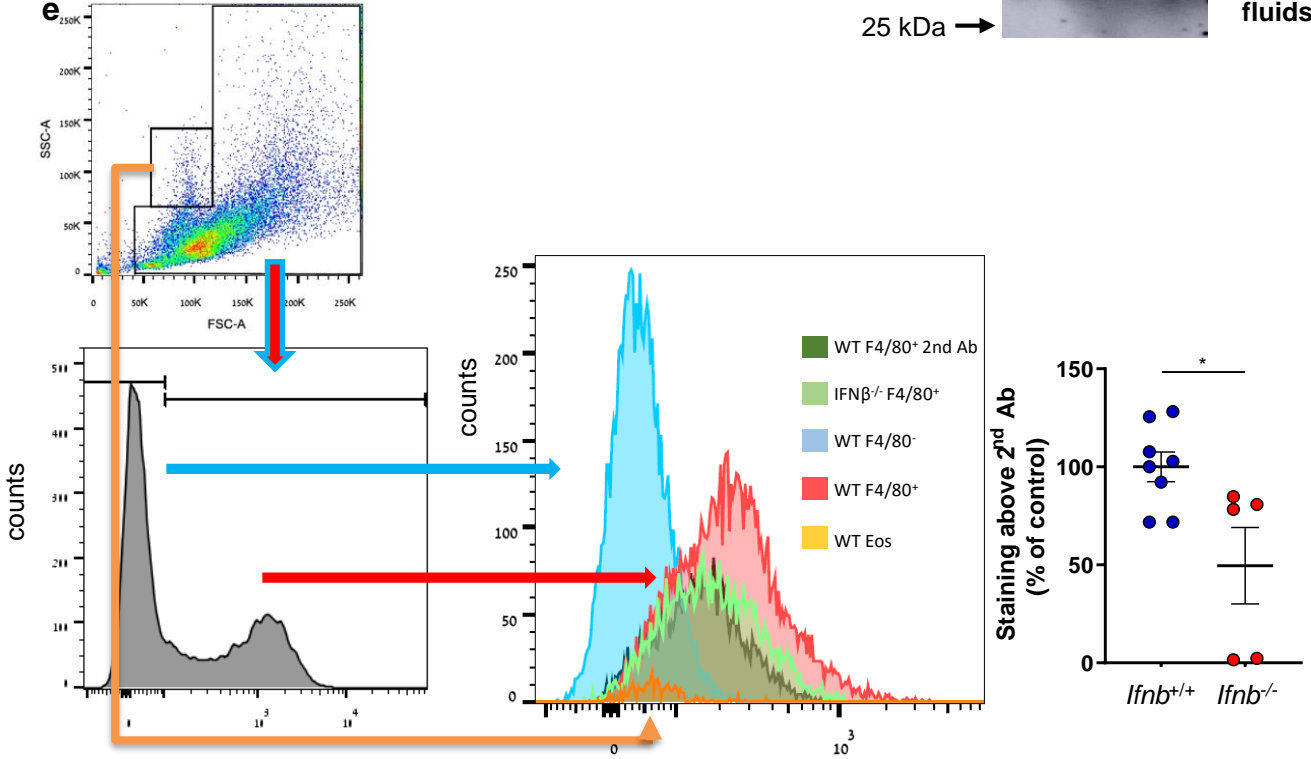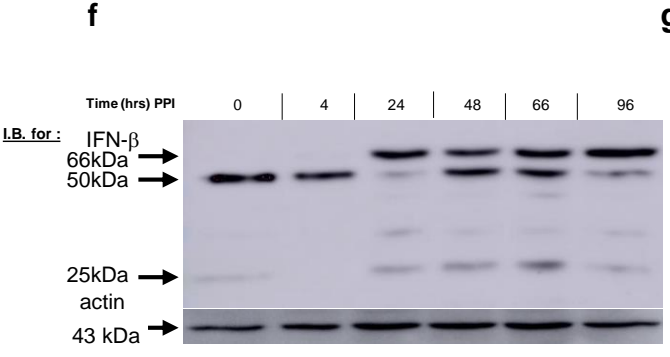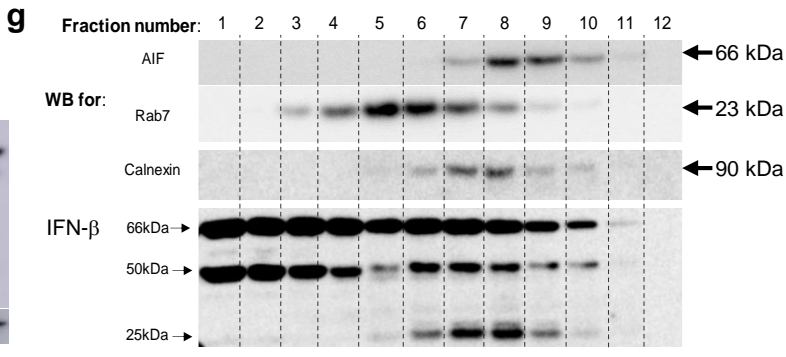

**Supplementary Figure 2. IFN- $\beta$  is expressed as a 50-66 kDa protein in murine macrophages but secreted primarily as a 25-35 kDa protein.** Peritoneal exudates were collected from *Ifnb*<sup>+/+</sup> or *Ifnb*<sup>-/-</sup> mice 48 (a) or 4 h (b) PPI and macrophages and peritoneal fluids, were immunoblotted separately for IFN- $\beta$ . Results are representatives for 4 experiments.

(c-d) *Ifnb*<sup>+/+</sup> mice were injected with clodronate-containing liposomes (Clod) or control vehicle-containing liposomes (Vehicle) 24 h prior to zymosan A administration and peritoneal fluids were recovered at 16 h PPI (c). Alternatively, clodronate or vehicle liposomes were injected at 24 h PPI and peritoneal fluids were recovered at 66 h PPI (d). Then, peritoneal fluids were run by SDS page and blotted for IFN $\beta$ . Blots are representative for 3 independent experiments (N=3 for each treatment).

(e) Peritoneal exudates were recovered from *Ifnb*<sup>+/+</sup> or *Ifnb*<sup>-/-</sup> mice 48 h PPI. The cells were immunostained for F4/80, fixed, permeabilized, and immunostained for IFN- $\beta$ . Upper panel shows the gating strategy for eosinophils and other immune cells. The latter were analyzed as F4/80<sup>+</sup> macrophages (lower panel, right marker) and F4/80<sup>-</sup> cells (lower panel, left marker). The histograms on the right side show IFN- $\beta$  levels in the F4/80<sup>-</sup> (blue line) and eosinophil (orange line) populations from WT mice, as well as 2<sup>nd</sup> antibody alone (dark green) and the staining of macrophages from *Ifnb*<sup>-/-</sup> mice (light green). The graph on the right indicates the specific expression of IFN- $\beta$  in WT mice compared to *Ifnb*<sup>-/-</sup> mice. Representative plots (left panels) and means  $\pm$  SEM from 7 *Ifnb*<sup>+/+</sup> and 5 *ifnb*<sup>-/-</sup> mice. \* P < 0.05 (Student's t test).

(f) F4/80<sup>+</sup> macrophages were isolated from peritoneal fluids of unchallenged mice or 4-96 h PPI and lysed. Equal protein amounts were subjected to SDS-PAGE, transferred to PVDF membranes and blotted for IFN- $\beta$  or actin as control. Blots are representative for 3 independent experiments (N=2-3 mice for each time point).

(g) RAW264.7 macrophages were incubated with apoptotic Jurkat cells for 24 h, lysed and organelles were separated on an OptiPrep density gradient with ultracentrifugation. The resulting fractions were subjected to SDS-PAGE and blotted for IFN- $\beta$ , as well as for AIF, Rab7, or Calnexin that served as indicators for mitochondria, secretory vesicles and ER, respectively. Blots are representative for 2 independent experiments. Source data are provided as a Source Data file.

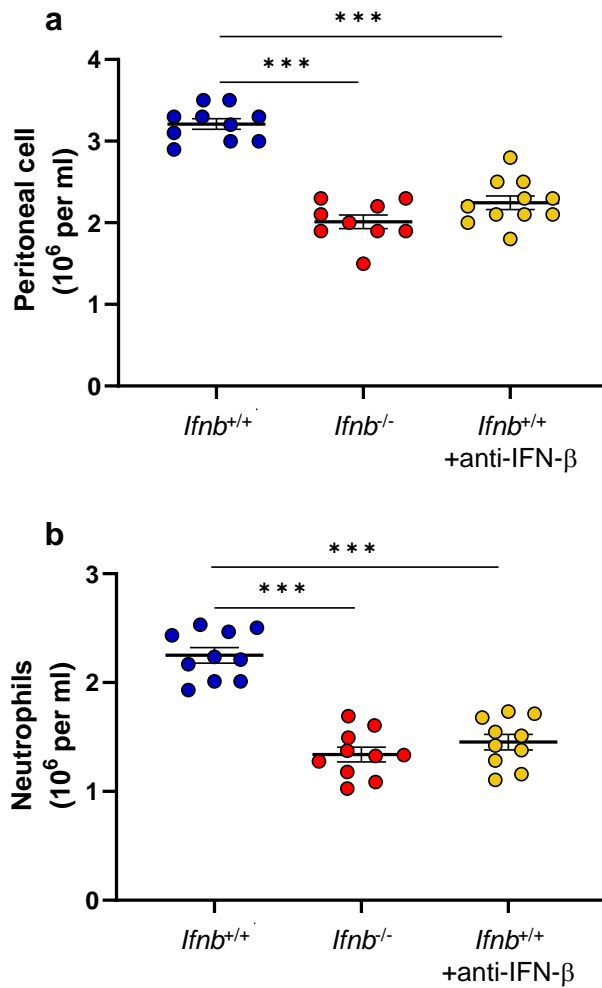

**Supplementary Figure 3. IFN- $\beta$  deficiency limits PMN infiltration to affected tissues during inflammation.** *Ifnb*<sup>+/+</sup> or *Ifnb*<sup>-/-</sup> mice were injected with zymosan A alone or with anti-IFN- $\beta$  antibodies (1  $\mu$ g/mouse). At 4 h, peritoneal exudates were recovered, enumerated and immunostained for Ly-6G, Ly-6C and F4/80. PMN were defined as Ly-6G<sup>+</sup>F4/80<sup>-</sup> cells. Total number of cells (a) and PMN count (b). Values are means  $\pm$  SEM for 9-11 mice per group. \*\*\* P < 0.005 (Tukey's HSD). Source data are provided as a Source Data file.

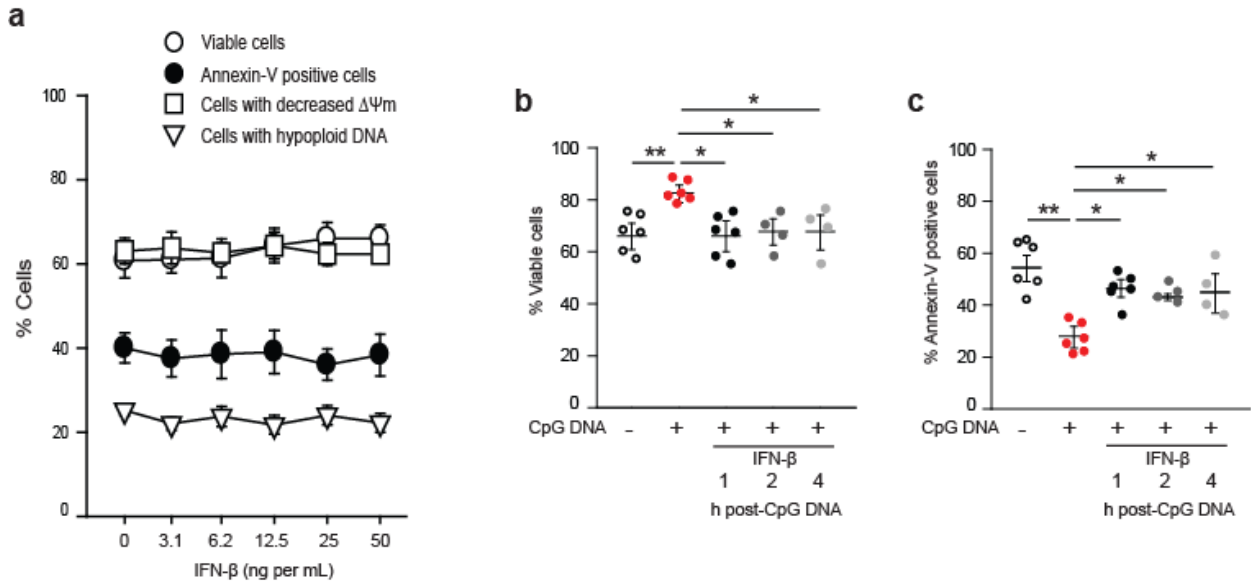

**Supplementary Figure 4. IFN- $\beta$  treatment reverses CpG DNA-induced survival of human neutrophils.** (a) Neutrophils ( $5 \times 10^6$  cells per ml) were cultured with varying concentrations of human recombinant IFN- $\beta$  or (b, c) with CpG DNA (1.6  $\mu\text{g}$  per ml) followed by addition of IFN- $\beta$  (50 ng per ml) at 1, 2 or 4 h post challenge with CpG DNA. After additional 24 h culture, cell viability, annexin-V staining, nuclear DNA content and mitochondrial transmembrane potential ( $\Delta\Psi_m$ ) were analyzed by flow cytometry. Results are means  $\pm$  SEM of 4-6 experiments with different blood donors. \*  $P < 0.05$ , \*\*  $P < 0.01$  (Dunn's multiple contrast hypothesis test). Source data are provided as a Source Data file.

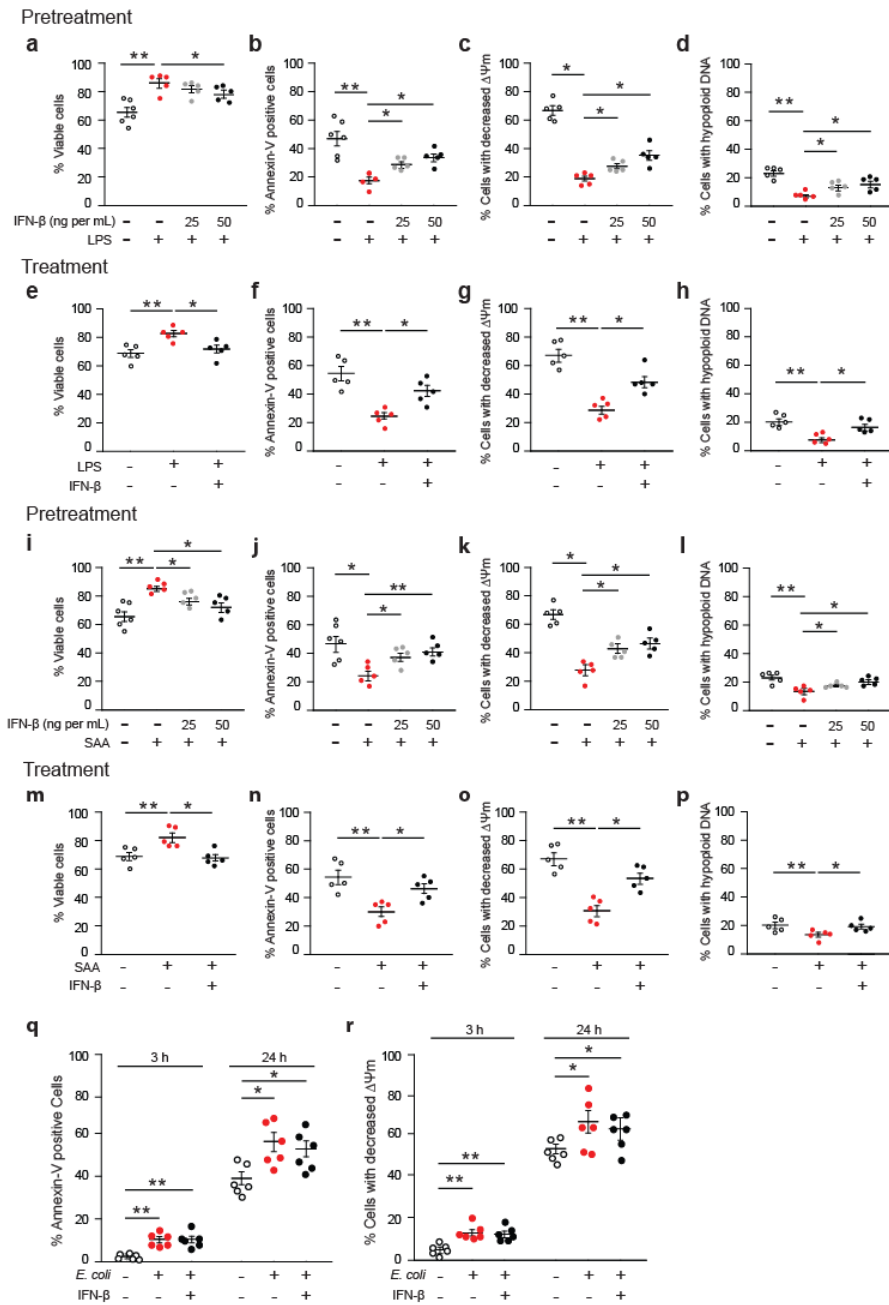

**Supplementary Figure 5. IFN-β reverses LPS or SAA-induced survival of human neutrophils, but does not promote phagocytosis-induced neutrophil apoptosis.** Neutrophils ( $5 \times 10^6$  cells per ml) were cultured with human recombinant IFN-β (50 ng per ml) for 10 min (**a-d, i-l**) then challenged with LPS (1 μg per ml) (**a-d**) or serum amyloid A (SAA, 10 μg per ml) (**i-l**) or were first challenged with LPS (**e-h**) or SAA (**m-p**) for 60 min then treated with IFN-β (50 ng per ml). After additional 24 h culture, cell viability, annexin-V staining, mitochondrial transmembrane potential ( $\Delta\Psi_m$ ), and cell with hypoploid nuclei were analyzed by flow cytometry. (**q-r**) Neutrophils were cultured with human recombinant IFN-β (50 ng per ml) for 10 min, and then *E. coli* was added to the cells at a ratio of 1:7. Development of apoptosis (annexin-V staining and cells with decreased  $\Delta\Psi_m$ ) was assessed at 3 and 24 h post-IFN-β. Results are mean  $\pm$  SEM of 5-6 experiments with different blood donors. \* P < 0.05, \*\* P < 0.01 (Dunn's multiple contrast hypothesis test). Source data are provided as a Source Data file.

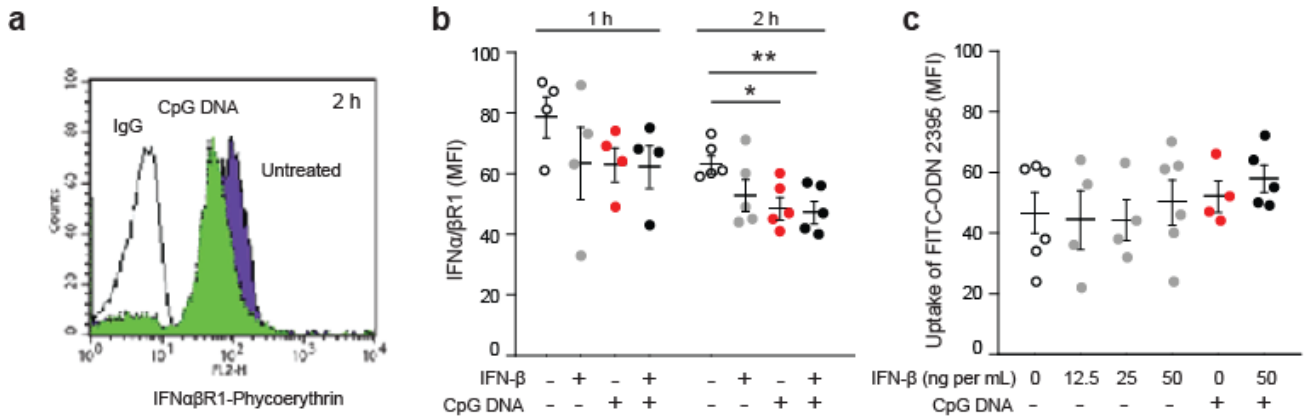

**Supplementary Figure 6. CpG DNA downregulates IFN $\alpha$ / $\beta$ R1 expression on human neutrophils, whereas IFN $\beta$  does not hamper ODN uptake.** (a-b) Neutrophils ( $5 \times 10^6$  cells per ml) were pretreated with human recombinant IFN- $\beta$  (50 ng per ml) or vehicle for 10 min and then challenged with CpG DNA (1.6  $\mu$ g per ml) or vehicle for 1 or 2 h. Surface IFN $\alpha$ / $\beta$ R1 expression was assessed by flow cytometry (representative plots in a) and expressed as MFI after correction based on staining with an isotype-matched irrelevant antibody (calculated averages in b). Data are mean  $\pm$  SEM for 4-5 experiments with different blood donors. \* $P < 0.05$ , \*\* $P < 0.01$  (Dunn's multiple contrast hypothesis test).

(c) Neutrophils were pretreated with human recombinant IFN- $\beta$  for 10 min, challenged with CpG DNA (1.6  $\mu$ g per ml) for 30 min and then uptake of FITC-labeled ODN 2395 was assessed at 30 min by flow cytometry. Data are mean  $\pm$  SEM for 4-6 experiments with different blood donors. Source data are provided as a Source Data file.



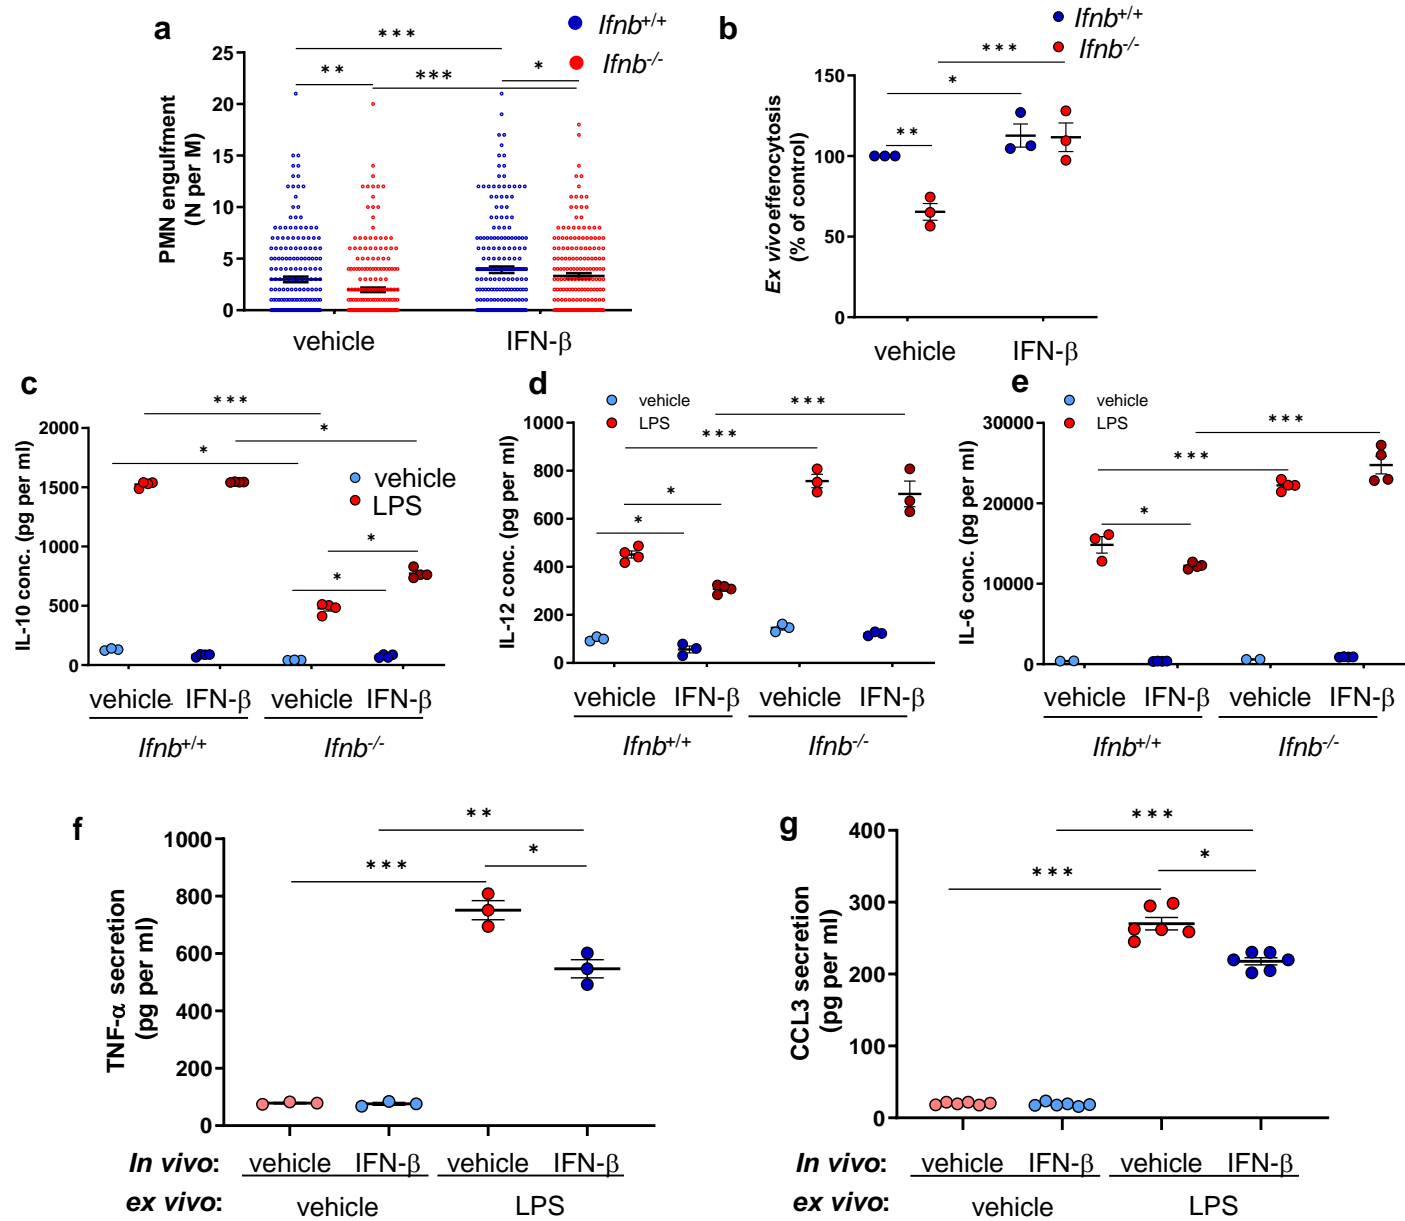

### Supplementary Figure 7. IFN-β treatment enhances macrophage reprogramming *in vivo*.

(a-b) *Ifnb*<sup>+/+</sup> or *Ifnb*<sup>-/-</sup> mice undergoing peritonitis were injected I.P. with IFN-β (20 ng/mouse) or vehicle at 24 h PPI and peritoneal macrophages were recovered at 48 h PPI. In separate experiments, peritoneal macrophages were recovered from *Ifnb*<sup>+/+</sup> or *Ifnb*<sup>-/-</sup> mice at 48 h PPI and incubated with CypHer-labeled apoptotic Jurkat cells at a ratio of 1:3. After 4 h, unbound cells were washed. All macrophages were stained with Hoechst 33342 and FITC-phalloidin, the average number of engulfed apoptotic cells in each macrophage were calculated (a) and normalized to control (b). Results are means ± SEM representative from n=206, 234, 211, and 224 macrophages for vehicle-*Ifnb*<sup>+/+</sup>, vehicle-*Ifnb*<sup>-/-</sup>, IFN-β-*Ifnb*<sup>+/+</sup> and IFN-β-*Ifnb*<sup>-/-</sup>, respectively (a) and n=523, 475, 335, and 360 macrophages for vehicle-*Ifnb*<sup>+/+</sup>, vehicle-*Ifnb*<sup>-/-</sup>, IFN-β-*Ifnb*<sup>+/+</sup> and IFN-β-*Ifnb*<sup>-/-</sup>, respectively (b). \* P< 0.05, \*\* P<0.01, \*\*\* P< 0.005 (Tukey's HSD).

(c-g) Alternatively, isolated *Ifnb*<sup>+/+</sup> (c-g) or *Ifnb*<sup>-/-</sup> macrophages (c-e) were challenged with LPS (1 μg/ml) or vehicle for 24 h and culture supernatants were analyzed for IL-10 (c), IL-12 (d), IL-6 (e), TNF-α (f) or CCL3 (g) using standard specific ELISAs. Results are means ± SEM representative from 3 experiments. \* P< 0.05, \*\* P<0.01, \*\*\* P< 0.005 (Tukey's HSD). Source data are provided as a Source Data file.

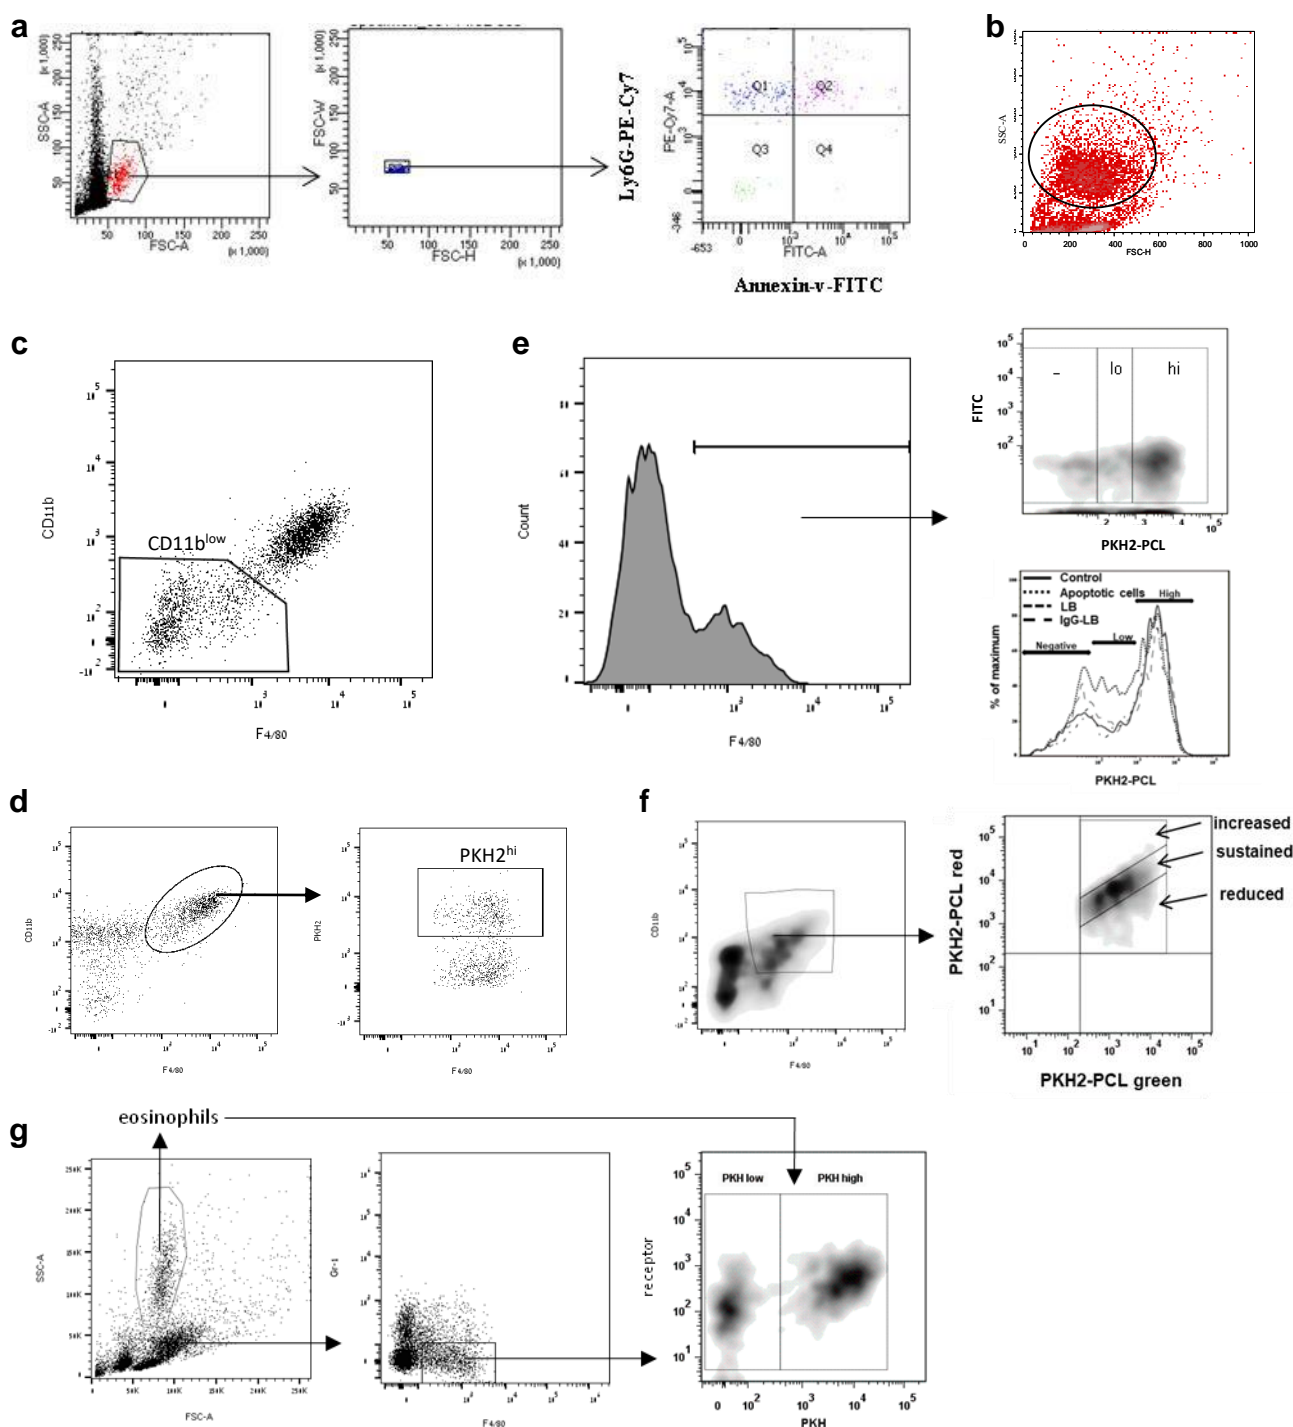

**Supplementary Figure 8. Gating strategies used in this manuscript.** a. Gating strategy to sort apoptotic neutrophils (Ly6G<sup>+</sup>/Annexin V<sup>+</sup>) from bronchoalveolar lavage in mice presented on Figure 2i, Figure 3h and Figure 8h. b. Gating strategy to assess isolated human neutrophils presented on Figure 4d-k, Figure 5c-f, Supplementary Figure 4a-c, Supplementary Figure 5a-r and Supplementary Figure 6a-b. Gating for neutrophils were confirmed by positive staining of the cells with an anti-CD66b antibody. c. Gating strategy for Figure 7g. d. Gating strategy for Figure 9a-b. e. Gating strategy for Figure 9c-g. f. Gating strategy for Figure 9 i-j. g. Gating strategy for Figure 9 k-l.

## **Supplementary Discussion**

Clinical trials have documented the beneficial effects of IFN- $\beta$  therapy, albeit with highly variable individual patient's response, in multiple sclerosis, a demyelinating and chronic inflammatory disease <sup>1</sup>. By contrast, IFN- $\beta$  secreted by stromal cells was found to block FAS-induced apoptosis in (unspecified subsets of) T cells, leading to perpetuation of T cell infiltration and chronic inflammation in rheumatoid arthritis <sup>2</sup>. Contradictory case reports suggest that IFN- $\beta$  therapy either may improve symptoms of preexisting rheumatoid arthritis or may induce polyarthritis in patients with multiple sclerosis who are genetically predisposed to develop arthritis <sup>3</sup>. Since IFN- $\beta$ -mediated rescue from FAS-triggered apoptosis is essential for the maintenance of memory T cells during the resolution phase, timing of IFN- $\beta$  therapy may also be critical. It is plausible that the effects of IFN- $\beta$  therapy will differ in neutrophil-driven inflammatory conditions and autoimmune disorders. This notion is further supported by the findings that IFN- $\beta$  activates STAT1, but not STAT3 or 5, in T cells to inhibit apoptosis <sup>4</sup>, while our results show STAT3, rather than STAT1, is essential for the inhibition of PMN survival.

## **Supplementary references**

1. Panitch, H. et al. Randomized, comparative study of interferon beta-1a treatment regimens in MS: The EVIDENCE Trial. *Neurology* 59, 1496-1506.(2002)
2. Scheel-Toellner, D. et al. Type I interferons inhibit the resolution of chronic inflammation. *Symp Soc Exp Biol* 52, 277-288.(2000)
3. Levesque, M.C., Ward, F.E., Jeffery, D.R. & Weinberg, J.B. Interferon-beta1A-induced polyarthritis in a patient with the HLA-DRB1\*0404 allele. *Arthritis Rheum* 42, 569-573.(1999)
4. Pilling, D. et al. Interferon-beta mediates stromal cell rescue of T cells from apoptosis. *Eur J Immunol* 29, 1041-1050.(1999)
